# Supplementary material for: Wild blueberry proanthocyanidins shape distinct gut microbiota profile and influence glucose homeostasis and intestinal phenotypes in high-fat high-sucrose fed mice
Source: PubMed Central journal article supplement (PMC7010699; doi:10.1038/s41598-020-58863-1), 2020-02-10
Supplement: 41598_2020_58863_MOESM1_ESM.pdf [file 41598_2020_58863_MOESM1_ESM.pdf]

1 **Supplementary information**

2  
3 **Wild blueberry proanthocyanidins shape distinct gut microbiota profile and influence**  
4 **glucose homeostasis and intestinal phenotypes in high-fat high-sucrose fed mice**

5  
6 Maria-Carolina Rodríguez-Daza<sup>1 2 a</sup>, Laurence Daoust<sup>1 2 a</sup>, Lemia Boutkrabt<sup>1</sup>, Geneviève Pilon<sup>1 3</sup>, Thibault  
7 Varin<sup>1</sup>, Stéphanie Dudonné<sup>1</sup>, Émile Levy<sup>1</sup>, André Marette<sup>1 3</sup>, Denis Roy<sup>1 2</sup> and Yves Desjardins<sup>1 2</sup>

8  
9 <sup>1</sup> *Institute of Nutrition and Functional Foods (INAF), Laval University, Québec, QC, Canada.*

10 <sup>2</sup> *Food Science Department, Faculty of Agriculture and Food, Laval University, Québec, QC, Canada.*

11 <sup>3</sup> *Department of Medicine, Faculty of Medicine, Cardiology Axis of the Quebec Heart and Lung*  
12 *Institute, Québec, QC, Canada.*

13 <sup>a</sup> *These authors contributed equally to this work*

14  
15  
16 **Corresponding Author:**

17 Yves Desjardins

18 Institute of Nutrition and Functional Foods (INAF)

19 Laval University, Québec

20 Pavillon des Services, # 2736

21 2440, Boulevard Hochelaga, Québec, QC, Canada G1V 0A6

22 Telephone: 418-262-0897; email: [yves.desjardins@fsaa.ulaval.ca](mailto:yves.desjardins@fsaa.ulaval.ca)

23

24

25

26

27

**Table S1.** Phenolic characterization of blueberry extract and polyphenolic fractions

| Polyphenol type                     | Polyphenols content (mg/100 g dry weight) |                        |                       |                       |
|-------------------------------------|-------------------------------------------|------------------------|-----------------------|-----------------------|
|                                     | Crude extract                             | Polyphenolic fractions |                       |                       |
|                                     | WBE                                       | F1                     | F2                    | F3                    |
| <b>Anthocyanins</b>                 | <b>840.1 ± 24.8</b>                       | <b>5248.2 ± 427.0</b>  | <b>29.2 ± 0.8</b>     | <b>ND</b>             |
| Delphinidin 3-galactoside           | 9.6 ± 0.6                                 | 57.7 ± 5.5             | 0.7 ± 0.1             | ND                    |
| Delphinidin 3-glucoside             | 28.4 ± 4.6                                | 262.2 ± 47.8           | 2.2 ± 0.1             | ND                    |
| Cyanidin 3-galactoside              | 18.5 ± 2.4                                | 66.5 ± 57.9            | 1.0 ± 0.1             | ND                    |
| Delphinidin 3-arabinoside           | 10.3 ± 2.6                                | 12.7 ± 0.2             | 0.9 ± 0.2             | ND                    |
| Cyanidin 3-glucoside                | 68.8 ± 3.4                                | 612.3 ± 49.3           | 3.2 ± 0.1             | ND                    |
| Petunidin 3-galactoside             | 14.6 ± 1.5                                | 83.1 ± 5.3             | 0.7 ± 0.3             | ND                    |
| Cyanidin 3-arabinoside              | 25.5 ± 2.4                                | 25.8 ± 1.3             | 1.6 ± 0.03            | ND                    |
| Petunidin 3-glucoside               | 53.0 ± 3.3                                | 512.8 ± 40.2           | 2.4 ± 0.2             | ND                    |
| Peonidin 3-galactoside              | 10.3 ± 1.5                                | 48.5 ± 3.4             | 0.3 ± 0.03            | ND                    |
| Petunidin 3-arabinoside             | 14.3 ± 2.3                                | 8.3 ± 0.2              | 0.7 ± 0.1             | ND                    |
| Peonidin 3-glucoside                | 56.5 ± 2.9                                | 554.2 ± 33.8           | 1.2 ± 0.1             | ND                    |
| Malvidin 3-galactoside              | 74.0 ± 5.1                                | 526.7 ± 52.9           | 1.2 ± 0.2             | ND                    |
| Malvidin 3-glucoside                | 207.8 ± 4.8                               | 2397.5 ± 198.8         | 6.8 ± 0.1             | ND                    |
| Malvidin 3-arabinoside              | 52.2 ± 4.4                                | 32.3 ± 4.4             | ND                    | ND                    |
| Delphinidin 3-(6"-acetyl) glucoside | 11.4 ± 0.5                                | 13.8 ± 1.3             | ND                    | ND                    |
| Cyanidin 3-(6"-acetyl) glucoside    | 27.0 ± 2.5                                | 7.2 ± 2.1              | 1.2 ± 0.1             | ND                    |
| Malvidin 3-(6"-acetyl) galactoside  | 26.0 ± 3.1                                | ND                     | ND                    | ND                    |
| Petunidin 3-(6"-acetyl) glucoside   | 24.0 ± 1.6                                | ND                     | 1.1 ± 0.2             | ND                    |
| Peonidin 3-(6"-acetyl) glucoside    | 19.2 ± 1.2                                | 7.9 ± 3.2              | 1.6 ± 0.05            | ND                    |
| Malvidin 3-(6"-acetyl) glucoside    | 88.5 ± 4.1                                | 18.7 ± 3.5             | 2.2 ± 0.1             | ND                    |
| <b>Proanthocyanins</b>              | <b>3290.4 ± 89.3</b>                      | <b>670.2 ± 83.4</b>    | <b>7047.7 ± 242.2</b> | <b>5520.3 ± 294.2</b> |
| Monomers                            | 322.0 ± 8.6                               | 121.4 ± 5.5            | 1074.4 ± 41.7         | 27.8 ± 2.2            |
| Dimers                              | 1544.9 ± 24.9                             | 141.1 ± 5.8            | 4676.1 ± 137.5        | 89.3 ± 6.5            |
| Trimers                             | 449.3 ± 3.7                               | 27.0 ± 4.1             | 924.3 ± 35.9          | 162.5 ± 7.4           |
| Tetramers                           | 255.9 ± 0.5                               | 11.0 ± 1.1             | 163.9 ± 8.8           | 412.5 ± 16.1          |
| Pentamers                           | 143.5 ± 3.0                               | 7.3 ± 1.1              | ND                    | 296.1 ± 8.7           |
| Hexamers                            | 99.7 ± 4.8                                | 10.4 ± 1.1             | ND                    | 210.0 ± 3.7           |
| Heptamers                           | 46.6 ± 3.2                                | ND                     | ND                    | 68.2 ± 0.7            |
| Octamers                            | 34.0 ± 1.0                                | ND                     | ND                    | 43.2 ± 6.3            |
| Nonamers                            | 26.1 ± 2.5                                | ND                     | ND                    | 35.1 ± 5.7            |
| Decamers                            | 16.6 ± 2.5                                | ND                     | ND                    | ND                    |
| Polymers >10                        | 351.6 ± 65.1                              | 352.0 ± 64.7           | 209.0 ± 18.3          | 4175.5 ± 236.8        |

| Polyphenols content (mg/100 g dry weight)          |               |                        |                |              |
|----------------------------------------------------|---------------|------------------------|----------------|--------------|
| Polyphenol type                                    | Crude extract | Polyphenolic fractions |                |              |
|                                                    | WBE           | F1                     | F2             | F3           |
| <b>Flavonols, flavan-3-nols and phenolic acids</b> | <b>4389.5</b> | <b>986.06</b>          | <b>18531.6</b> | <b>86.04</b> |
| Catechin                                           | 97.7 ± 3.6    | 1.7 ± 1.8              | 298.2 ± 1.0    | 5.7 ± 3.4    |
| Epicatechin                                        | 75.5 ± 3.1    | 0.9 ± 0.8              | 214.1 ± 27.4   | 8.9 ± 4.3    |
| Gallic acid                                        | 115.3 ± 2.2   | 34.1 ± 2.6             | 650.2 ± 21.1   | 1.1 ± 0.2    |
| Protocatechuic acid                                | 355.9 ± 1.6   | 295.8 ± 9.0            | 1330.0 ± 80.1  | 6.6 ± 0.8    |
| <i>P</i> -coumaric acid                            | 116.2 ± 13.3  | ND                     | 41.0 ± 7.0     | ND           |
| Caffeic acid                                       | 134.3 ± 5.3   | 4.6 ± 0.9              | 598.7 ± 24.4   | ND           |
| Ferulic acid                                       | 15.4 ± 2.1    | ND                     | 3.2 ± 1.1      | ND           |
| 3-caffeoylquinic acid                              | 23.8 ± 1.9    | 0.5 ± 0.5              | 81.8 ± 11.9    | 1.4 ± 0.3    |
| 4-caffeoylquinic acid                              | 28.4 ± 1.4    | 0.4 ± 0.2              | 327.3 ± 8.5    | 5.3 ± 1.5    |
| 5-caffeoylquinic acid                              | 1363.3 ± 42.7 | 13.0 ± 1.7             | 4015.3 ± 257.2 | 27.5 ± 1.5   |
| Quercetin                                          | 739.1 ± 17.7  | 630.9 ± 13.4           | 4424.1 ± 196.8 | 11.4 ± 0.8   |
| Quercetin-glucoside                                | 414.5 ± 11.1  | 0.4 ± 0.4              | 2273.2 ± 91.0  | 7.5 ± 1.4    |
| Quercetin-galactoside                              | 135.7 ± 5.3   | 1.26 ± 0.45            | 760.7 ± 29.4   | 2.0 ± 0.6    |
| Quercetin-rhamnoside                               | 250.3 ± 13.0  | ND                     | 1422.9 ± 63.3  | 3.6 ± 2.3    |
| Quercetin-xyloside                                 | 133.8 ± 10.6  | ND                     | 726.8 ± 64.0   | 1.1 ± 0.7    |
| Quercetin-arabinoside                              | 101.6 ± 4.2   | ND                     | 344.1 ± 8.0    | 0.4 ± 0.5    |
| Rutin                                              | 288.7 ± 3.8   | 2.5 ± 0.4              | 1020.0 ± 27.9  | 3.5 ± 0.6    |

Results are expressed as mean of triplicate ± SD. ND, not detected. DP, Degree of polymerisation.

31  
32  
33  
34  
35  
36  
37  
38  
39  
40  
41  
42  
43  
44  
45  
46  
47  
48  
49  
50  
51  
52  
53

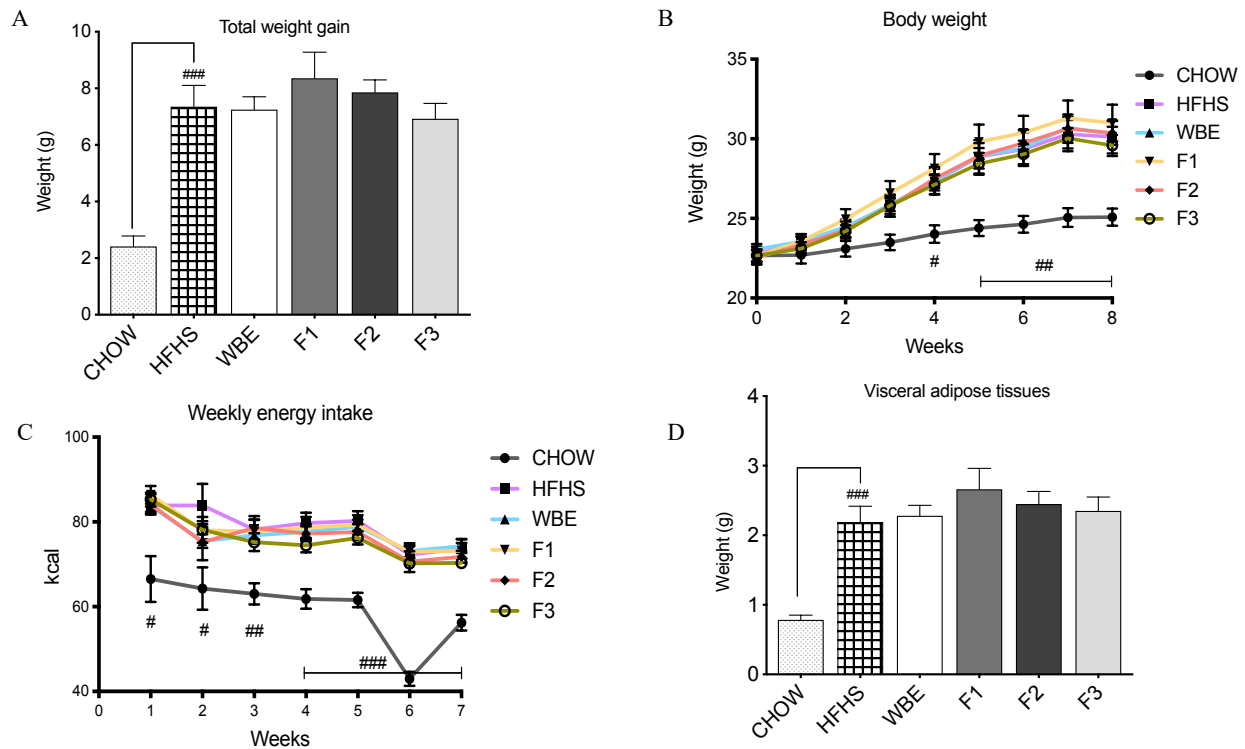

54  
 55 **Figure S1. Body weight gain in treated mice are not affected by the administration of a WBE and BPF.** C57BL/6J mice  
 56 were fed an HFHS diet and treated with the vehicle (water), the WBE or a BPF: Fraction rich in anthocyanin and phenolic acids  
 57 (F1), oligomeric PACs, phenolic acids and flavonols (F2) and polymeric PACs (F3) enriched fractions for 8 weeks. A) Body weight  
 58 gain; B) weight gain curves; C) energy intake; D) visceral adipose tissue weight. One-way ANOVA with a Dunnett post hoc test  
 59 was applied to calculate the significance of the differences between groups. Two-way repeated measures RM-ANOVA with a  
 60 Dunnett post hoc test was applied to calculate the significance between groups at different time points. Values are expressed as the  
 61 mean  $\pm$  SEM (n = 12). \*p < 0.05 compared to HFHS; Chow vs HFHS # p < 0,05 ### p < 0,001, #### p < 0.0001.

62  
 63  
 64  
 65  
 66  
 67

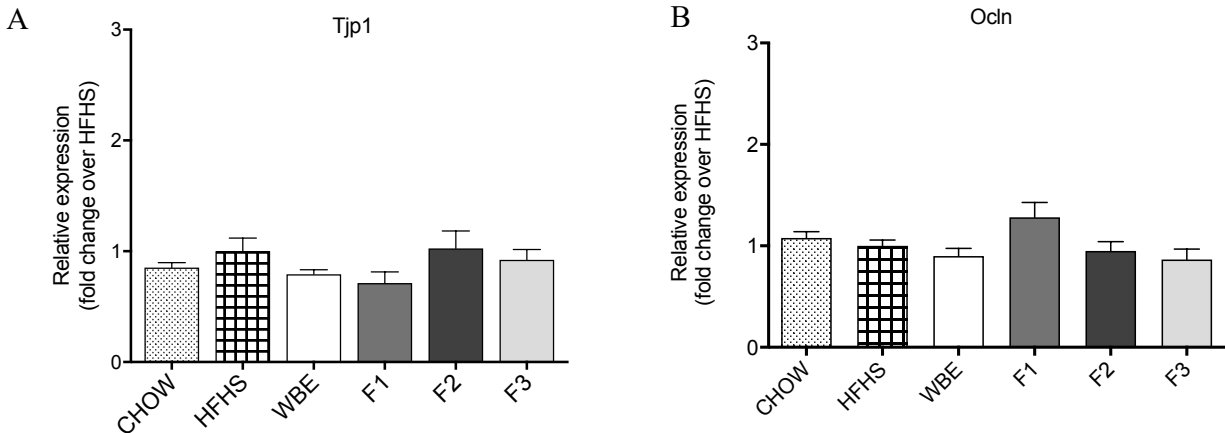

69  
70 **Figure S2. Effects of WBE and BPF on colonic mucin secretion and tight junction integrity of HFHS-fed mice.** Relative gene  
71 expression determined by RT-qPCR were evaluated in colon tissues of HFHS and BPF fed mice. A) mRNA levels for Tight junction  
72 protein 1 (Tjp1) and B) Occludin (Ocln) (n=10-12 per group). Ordinary one-way ANOVA a Dunnett post hoc test was performed,  
73 mean +/- SEM,  $p < 0.01$ ## compared to Chow.

74

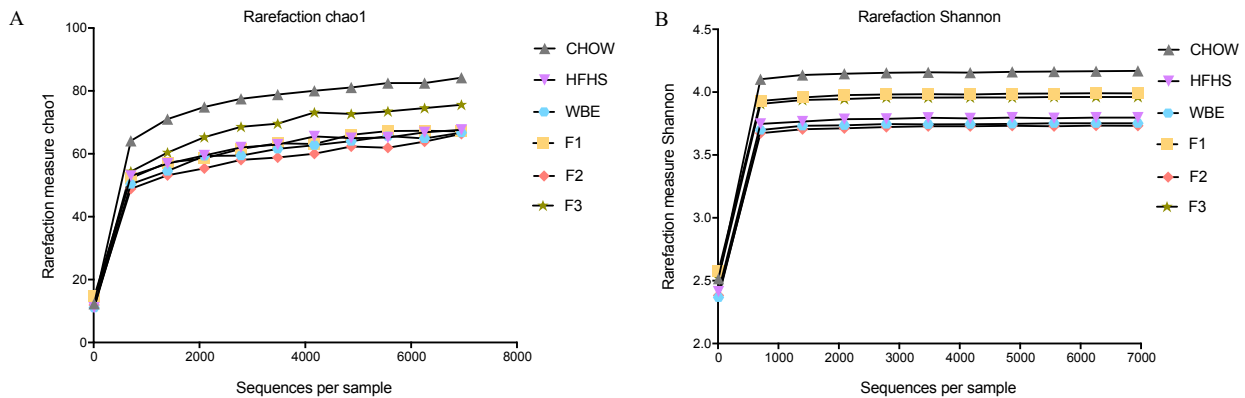

75

76 **Figure S3. Rarefaction curves graphing within-sample using alpha Chao1 and Shannon diversity measures on mouse fecal**  
77 **bacterial communities.** A) Chao1 alpha diversity indicated HFHS-fed mice had reduced species richness than Chow controls.  
78 Curves are shown for samples treated with WBE and BPF: anthocyanin and phenolic acids (F1), oligomeric PACs, phenolic acids  
79 and flavonols (F2) and polymeric PACs (F3). Kruskal-Wallis test with Benjamini multiple comparison correction were conducted  
80 to compare diversity between groups after 8 weeks of dietary treatment. Significant differences were not found between groups  
81 ( $P > 0.05$  at all sampling depth) B) Shannon diversity considering the abundance and richness showed curves similar depth of  
82 sequences among HFHS-fed mice and polyphenols treated mice.

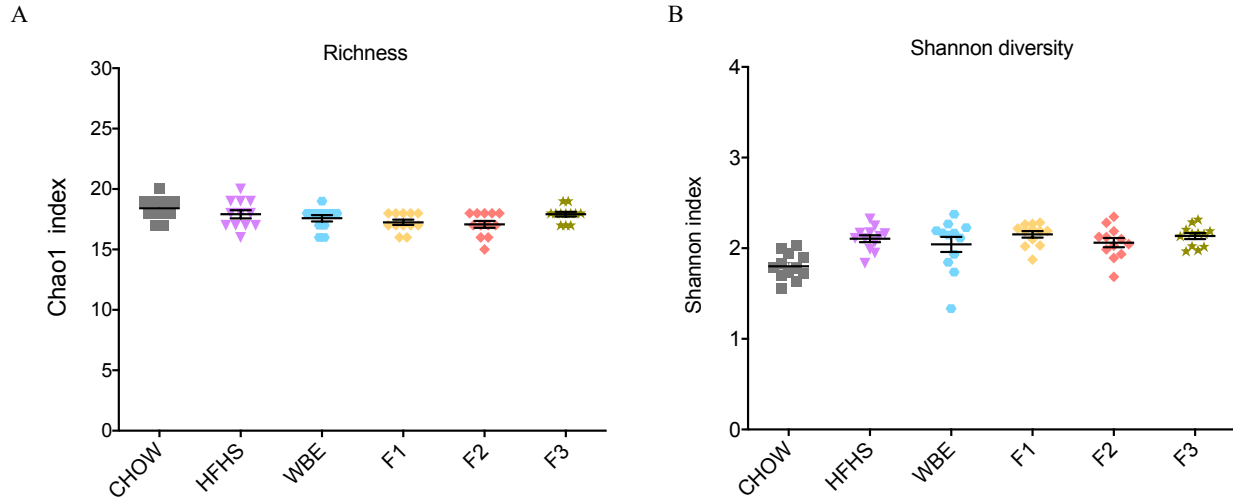

83

84 **Figure S4. Alpha diversity indices.** The effect of HFHS-diet and the supplementation with WBE and BPF: anthocyanin and  
 85 phenolic acids (F1), oligomeric PACs, phenolic acids and flavonols (F2) and polymeric PACs (F3) on the microbial alpha diversity  
 86 were studied. A) Richness: the number of bacterial species assigned by OTUs detected in the samples was obtained using Chao1  
 87 index. B) Shannon's diversity index: Incorporates both richness and evenness. Kruskal-Wallis test with Benjamini multiple  
 88 comparison correction were conducted to compare diversity between diets after 8 weeks of feeding. Mean values  $\pm$ SEM are plotted,  
 89 no significant differences were found.

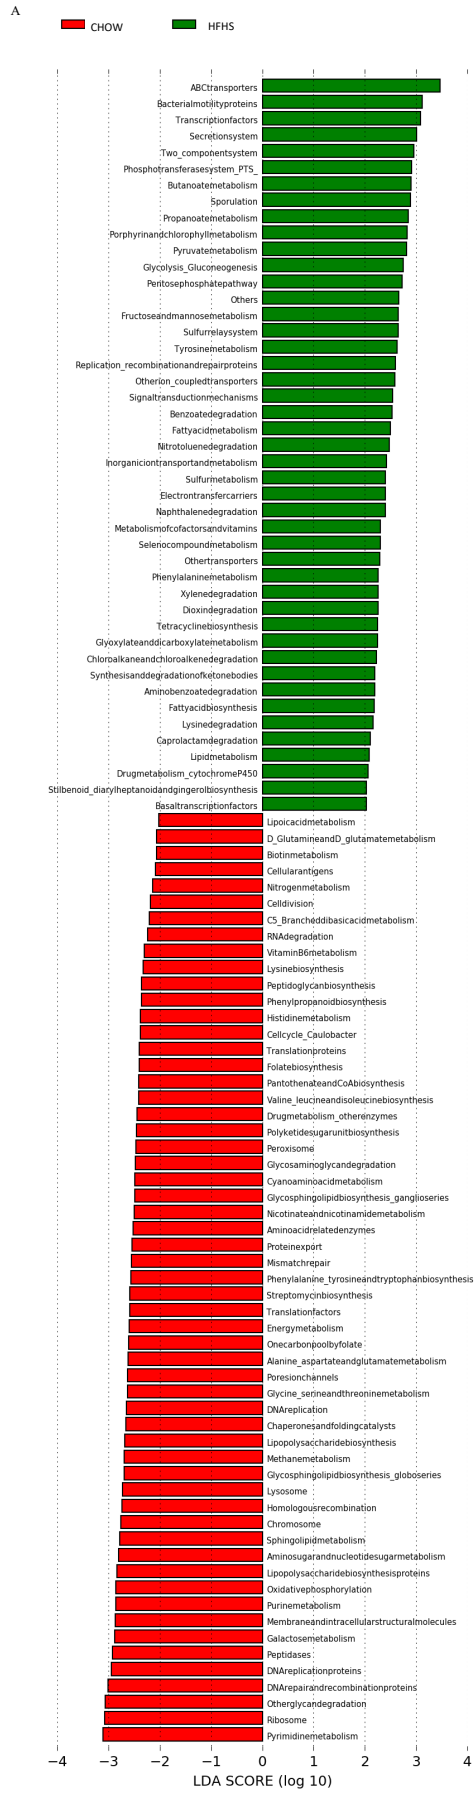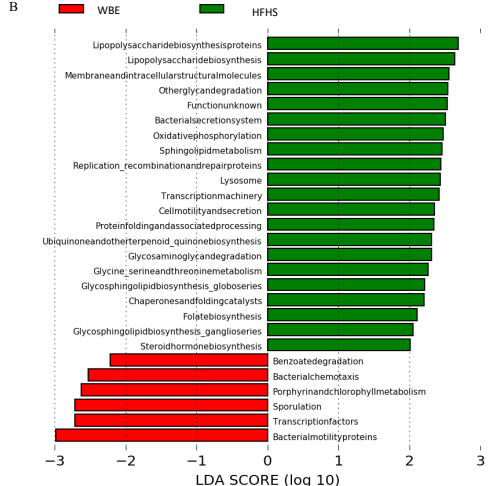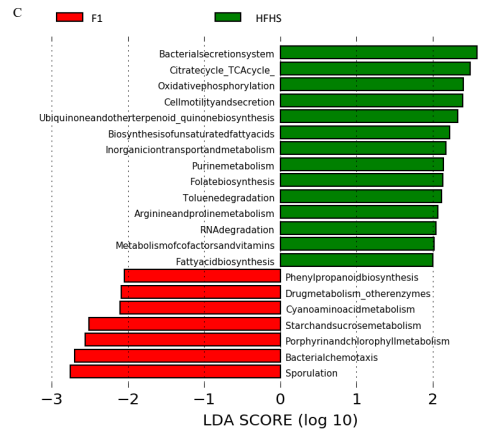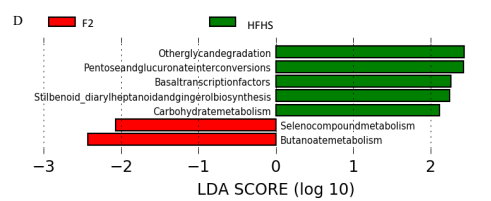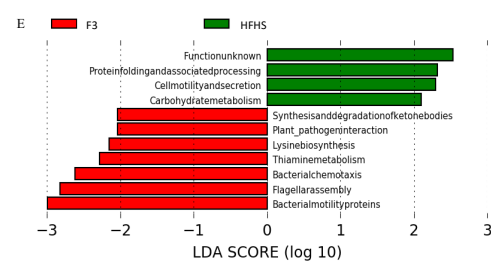

91 **Figure S5. LEfse analysis of fecal microbial functional profiles between HFHS-fed mice and wild blueberry polyphenols**  
92 **treated mice.** LDA scores for the bacterial taxa differentially abundant between HFHS-fed mice, WBE and BPF: anthocyanin and  
93 phenolic acids (F1), oligomeric PACs, phenolic acids flavonols (F2) and polymeric PACs (F3). Positive and negative LDA scores  
94 indicate the bacterial taxa enriched in A) WBE-fed mice vs HFHS, B) F1-fed mice vs HFHS, C) F2 vs HFHS and D) F3 vs HFHS.  
95 Only the taxa having a  $p < 0.05$  (Wilcoxon-Mann Whitney rank-sum test) and  $LDA > 2.0$  are shown in the figure legend.

96
